# Supplementary material for: Discovery and optimisation of pyrazolo[1,5-a]pyrimidines as aryl hydrocarbon receptor antagonists
Source: Royal Society of Chemistry journal article supplement (doi:10.1039/d4md00266k), 2024-01-01

**$^1\text{H}$ - and  $^{13}\text{C}$ -NMR spectra of compounds:**

<sup>1</sup>H-NMR spectrum of **7a** in CDCl<sub>3</sub>

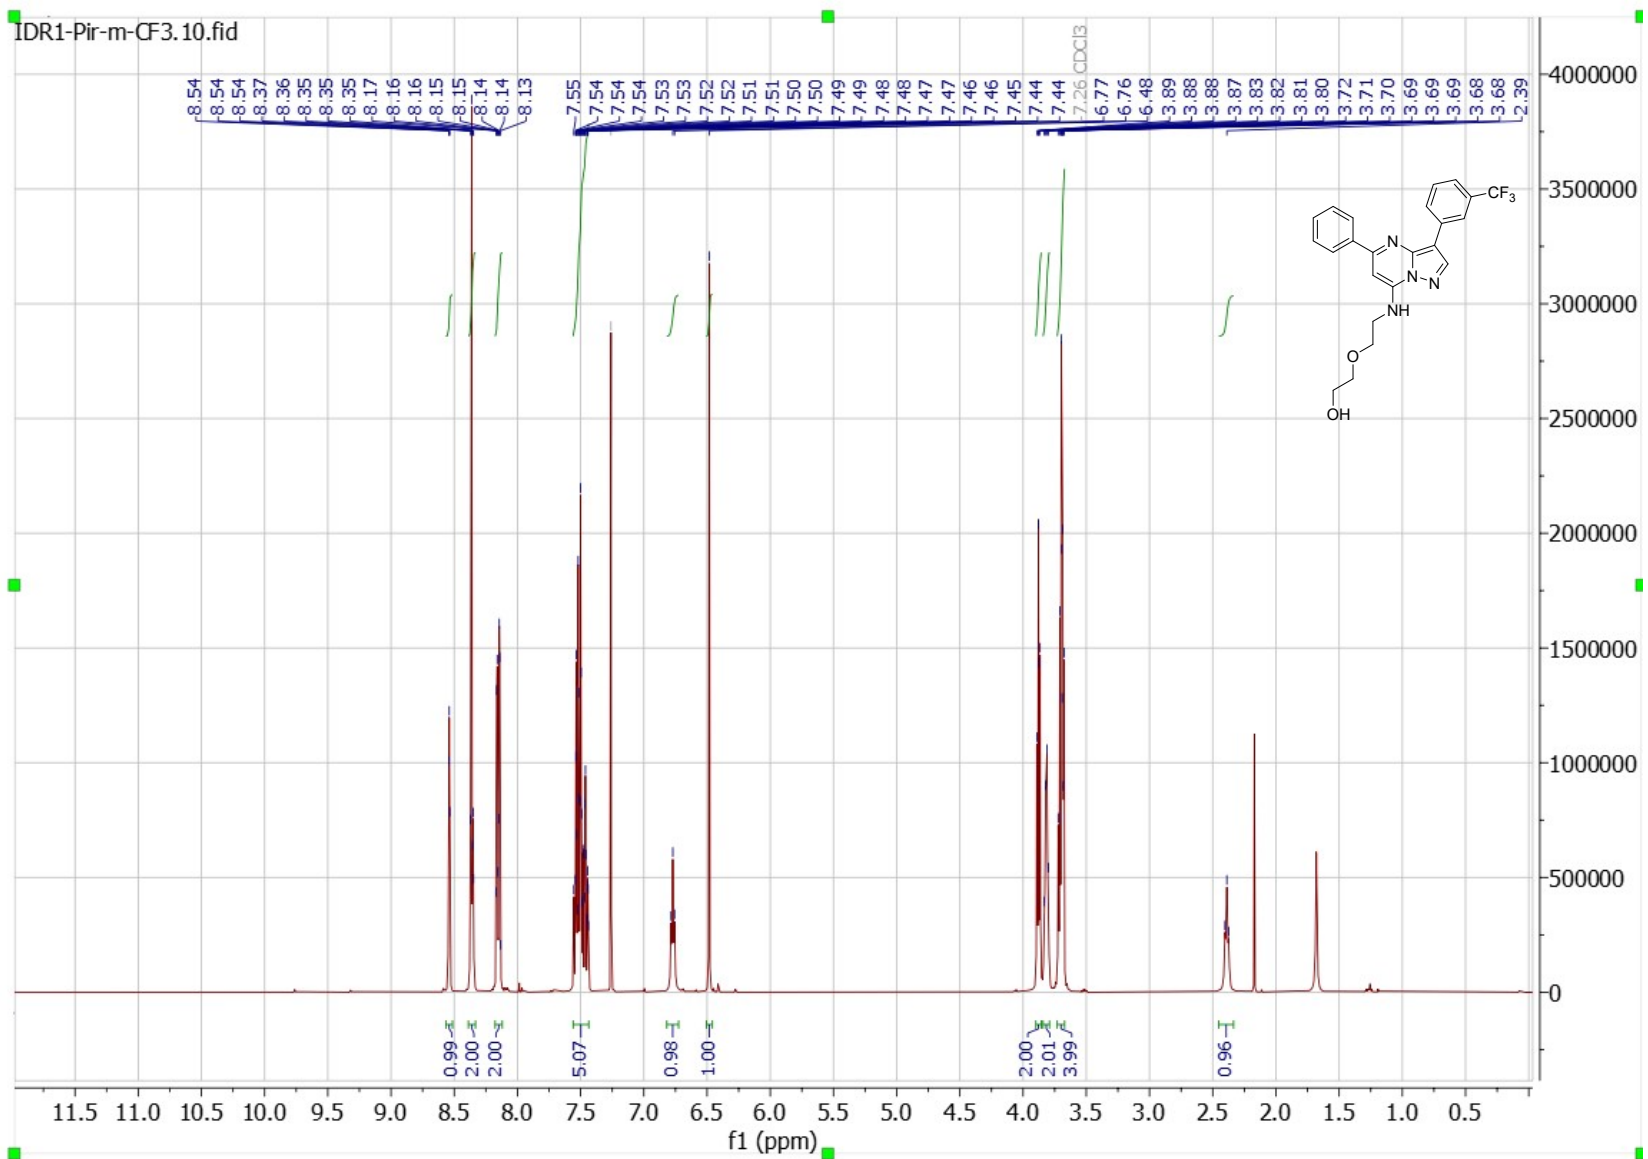

$^{13}\text{C}$ -NMR spectrum of **7a** in  $\text{CDCl}_3$

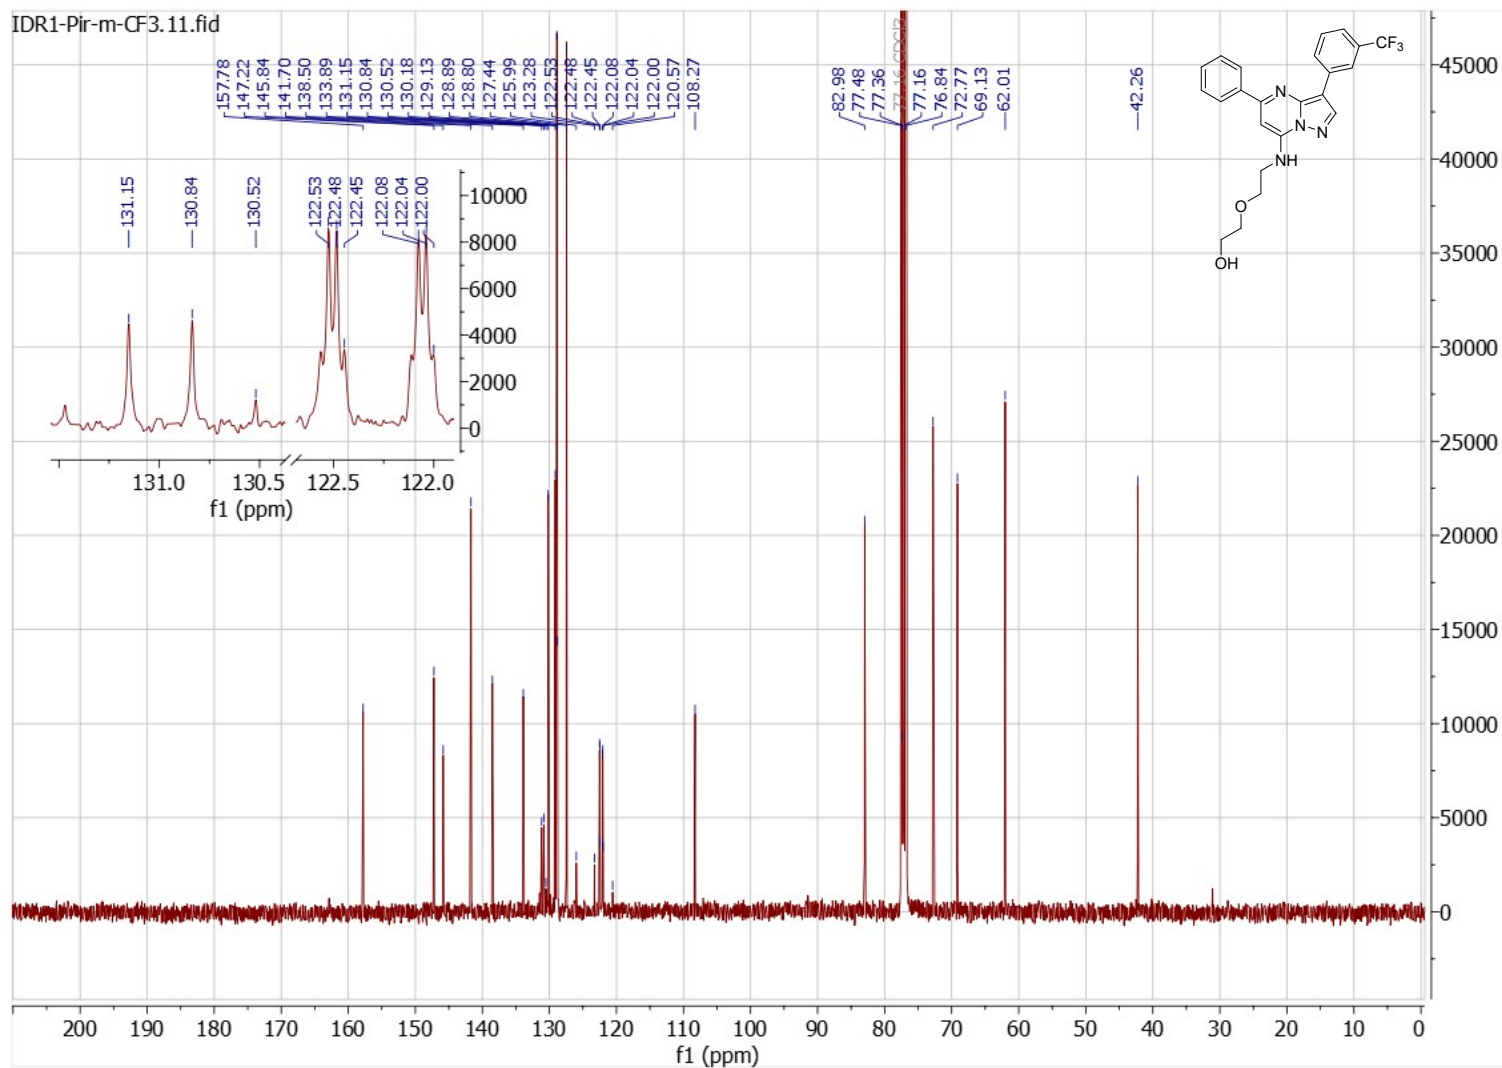

<sup>1</sup>H-NMR spectrum of **7b** in CD<sub>3</sub>OD

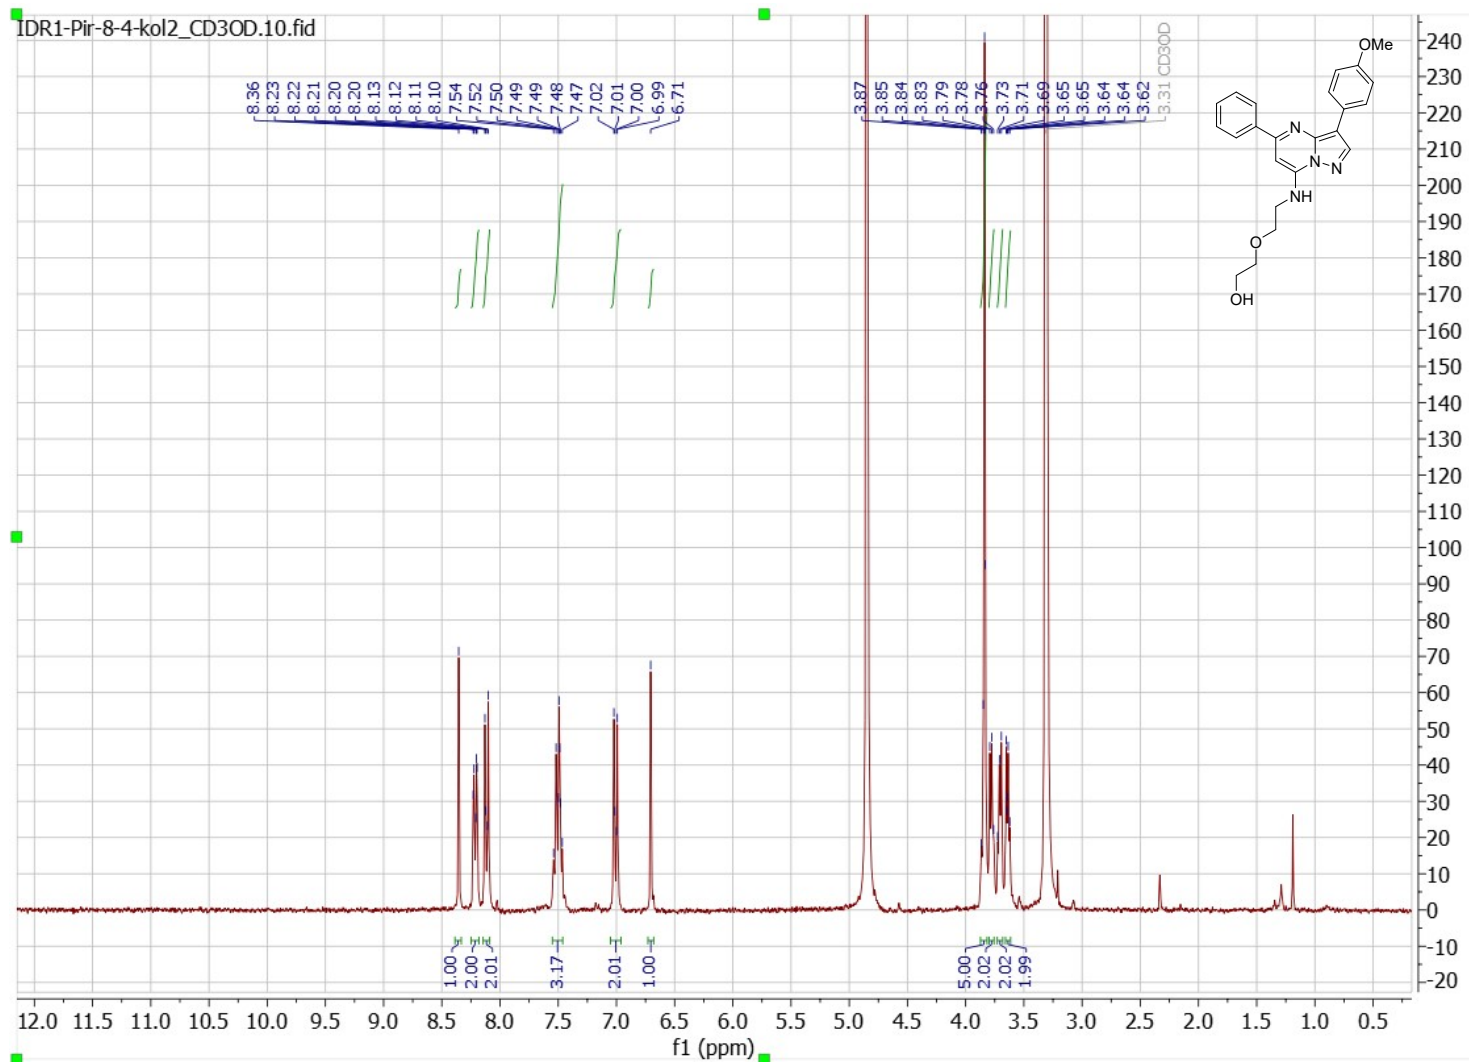

$^{13}\text{C}$ -NMR spectrum of **7b** in  $\text{CDCl}_3$

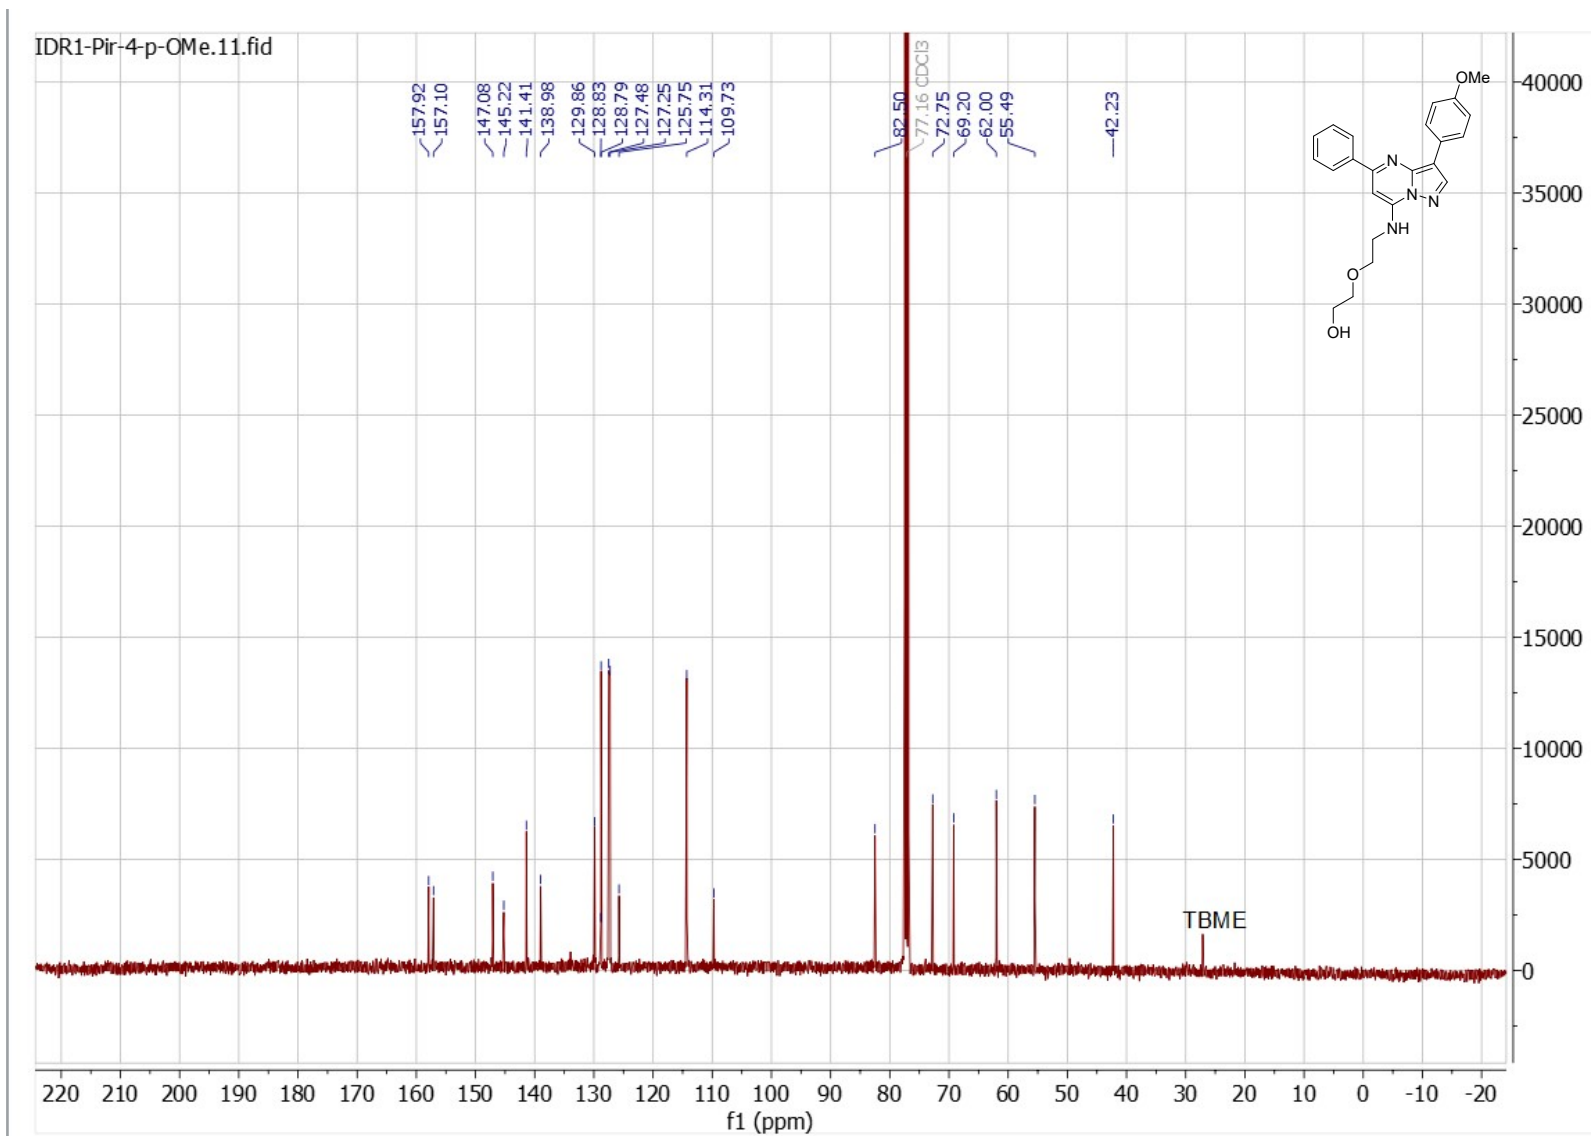

$^1\text{H-NMR}$  spectrum of **7c** in  $\text{CD}_3\text{OD}$

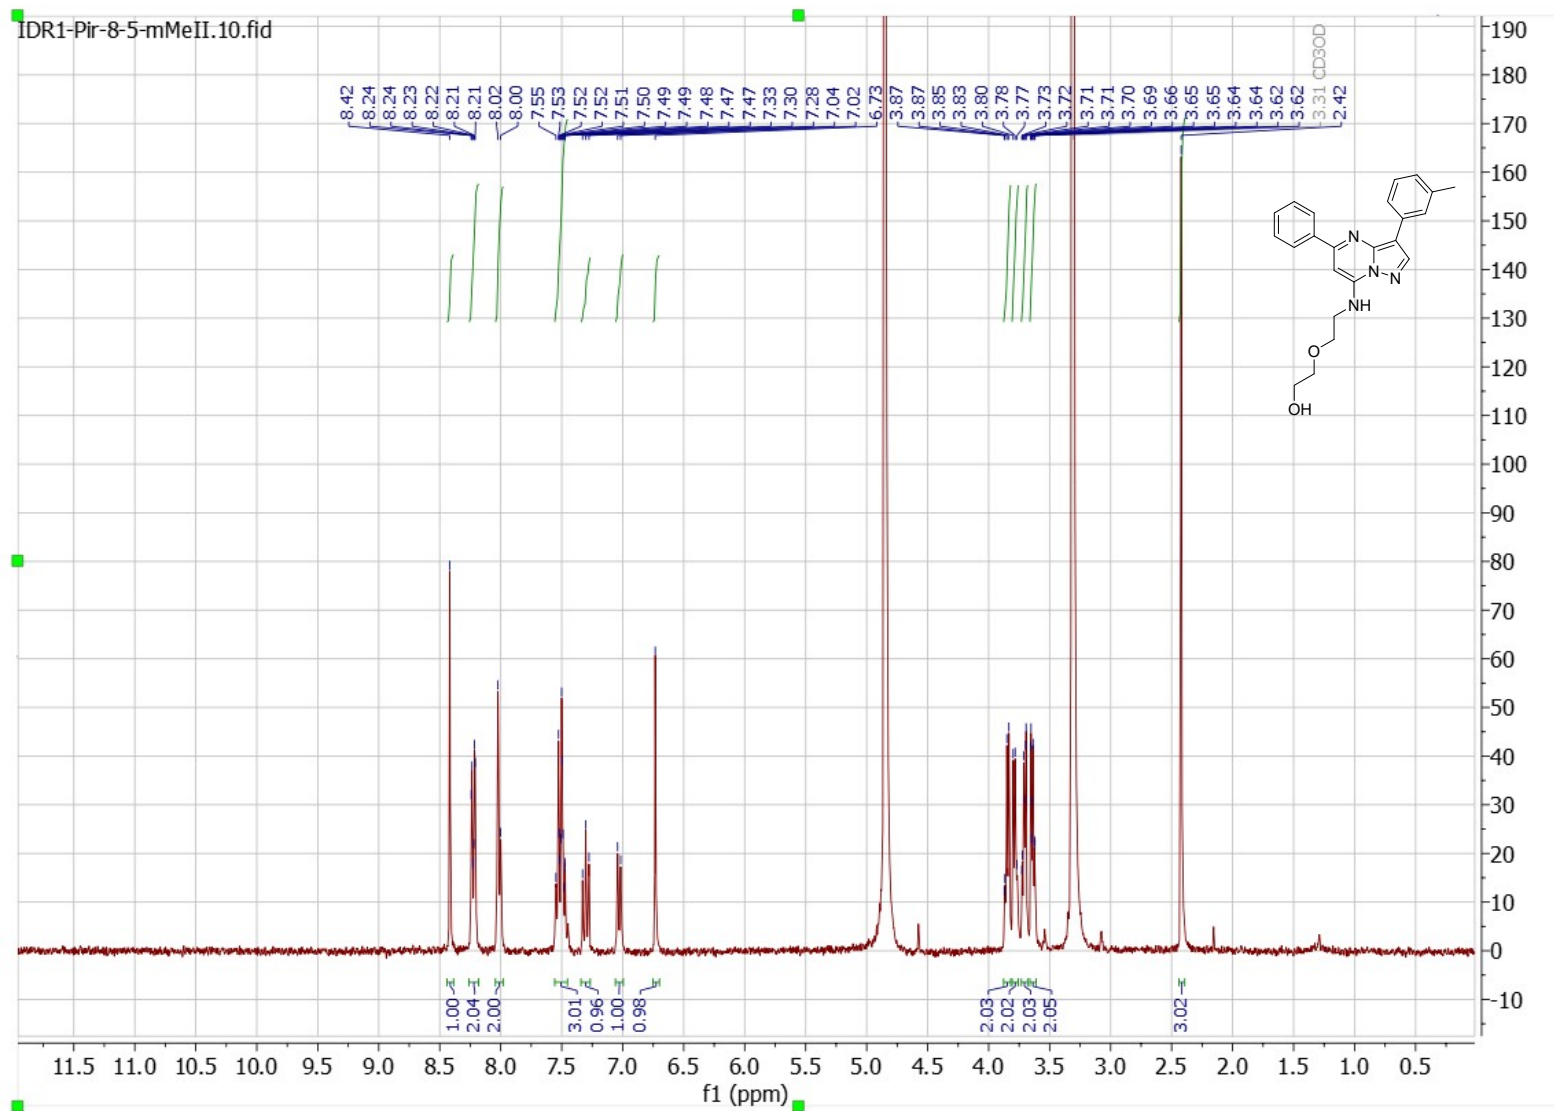

<sup>13</sup>C-NMR spectrum of **7c** in CD<sub>3</sub>OD

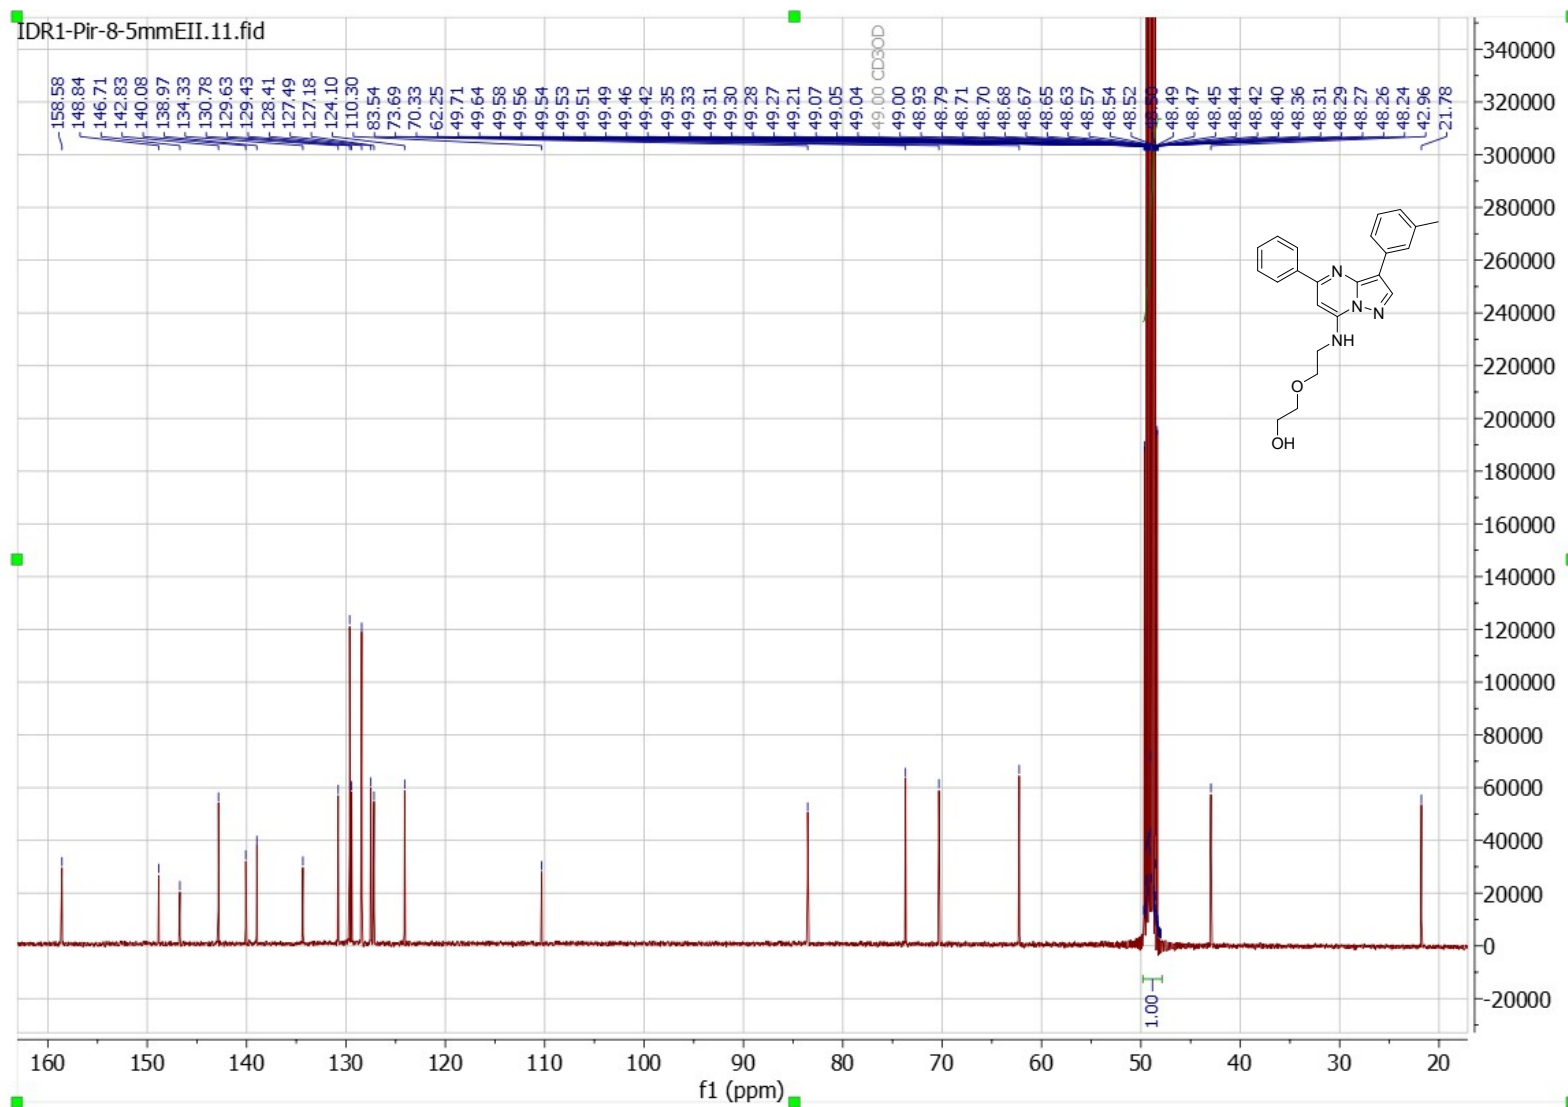

$^1\text{H-NMR}$  spectrum of **7d** in  $\text{CDCl}_3$

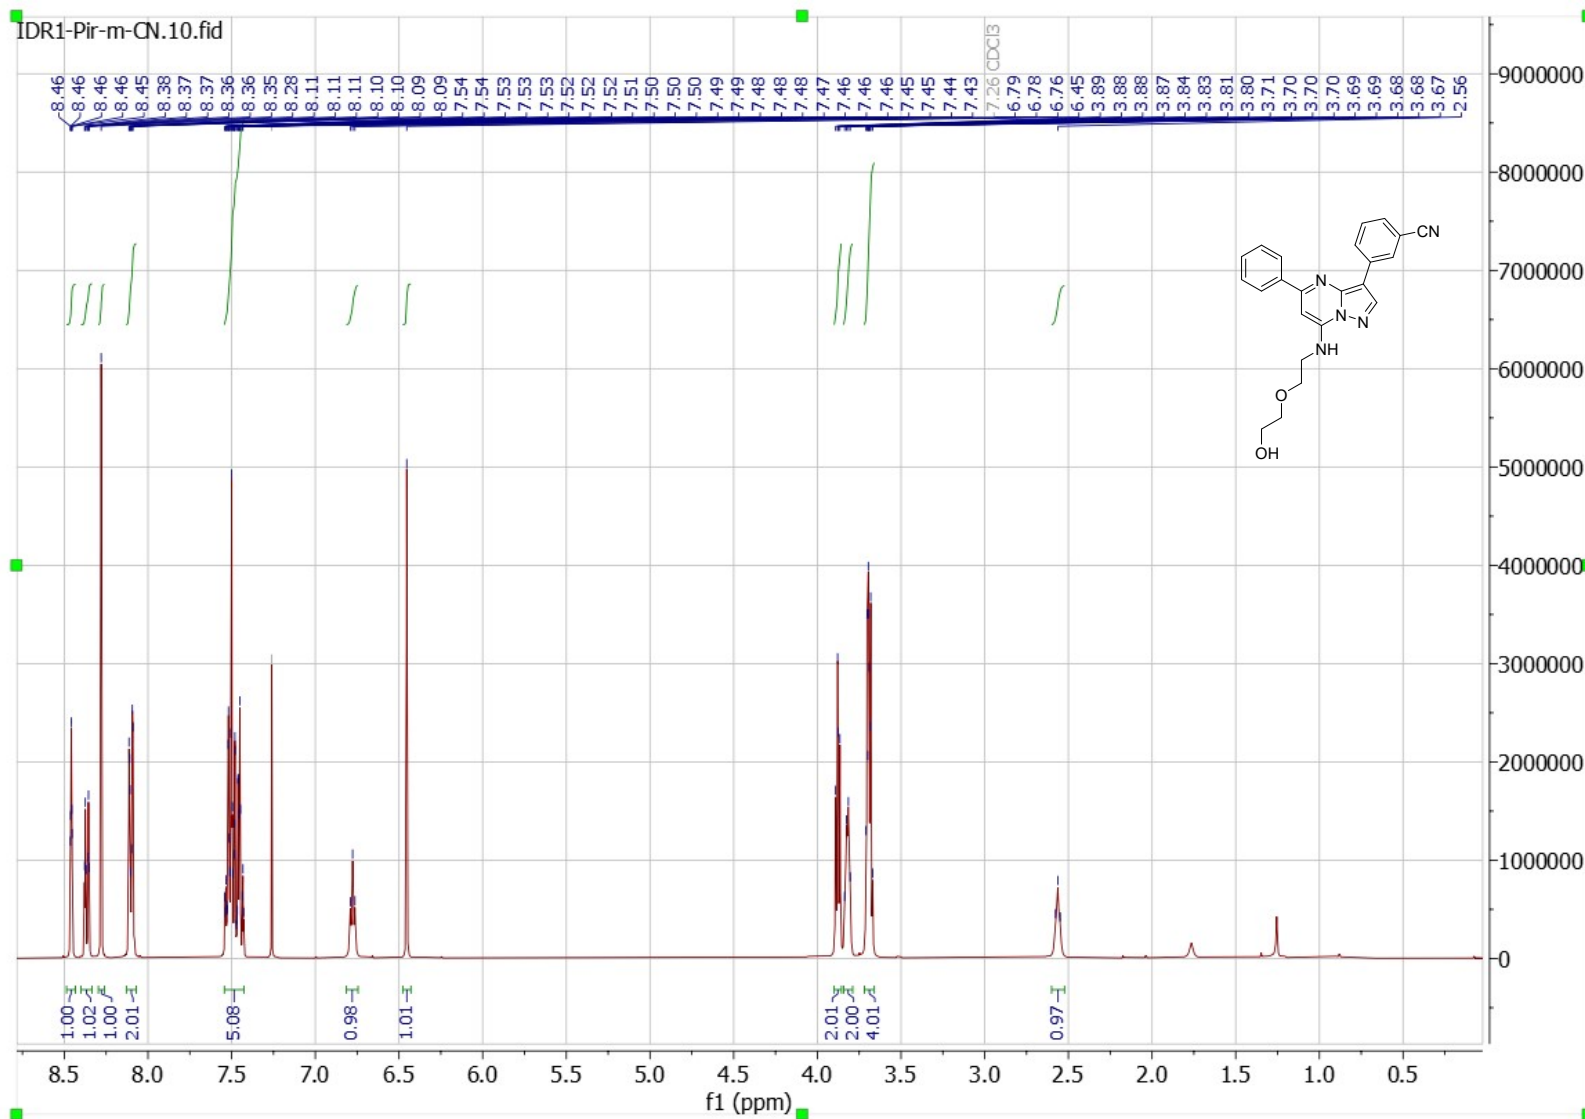



$^{13}\text{C}$ -NMR spectrum of **7d** in  $\text{CDCl}_3$

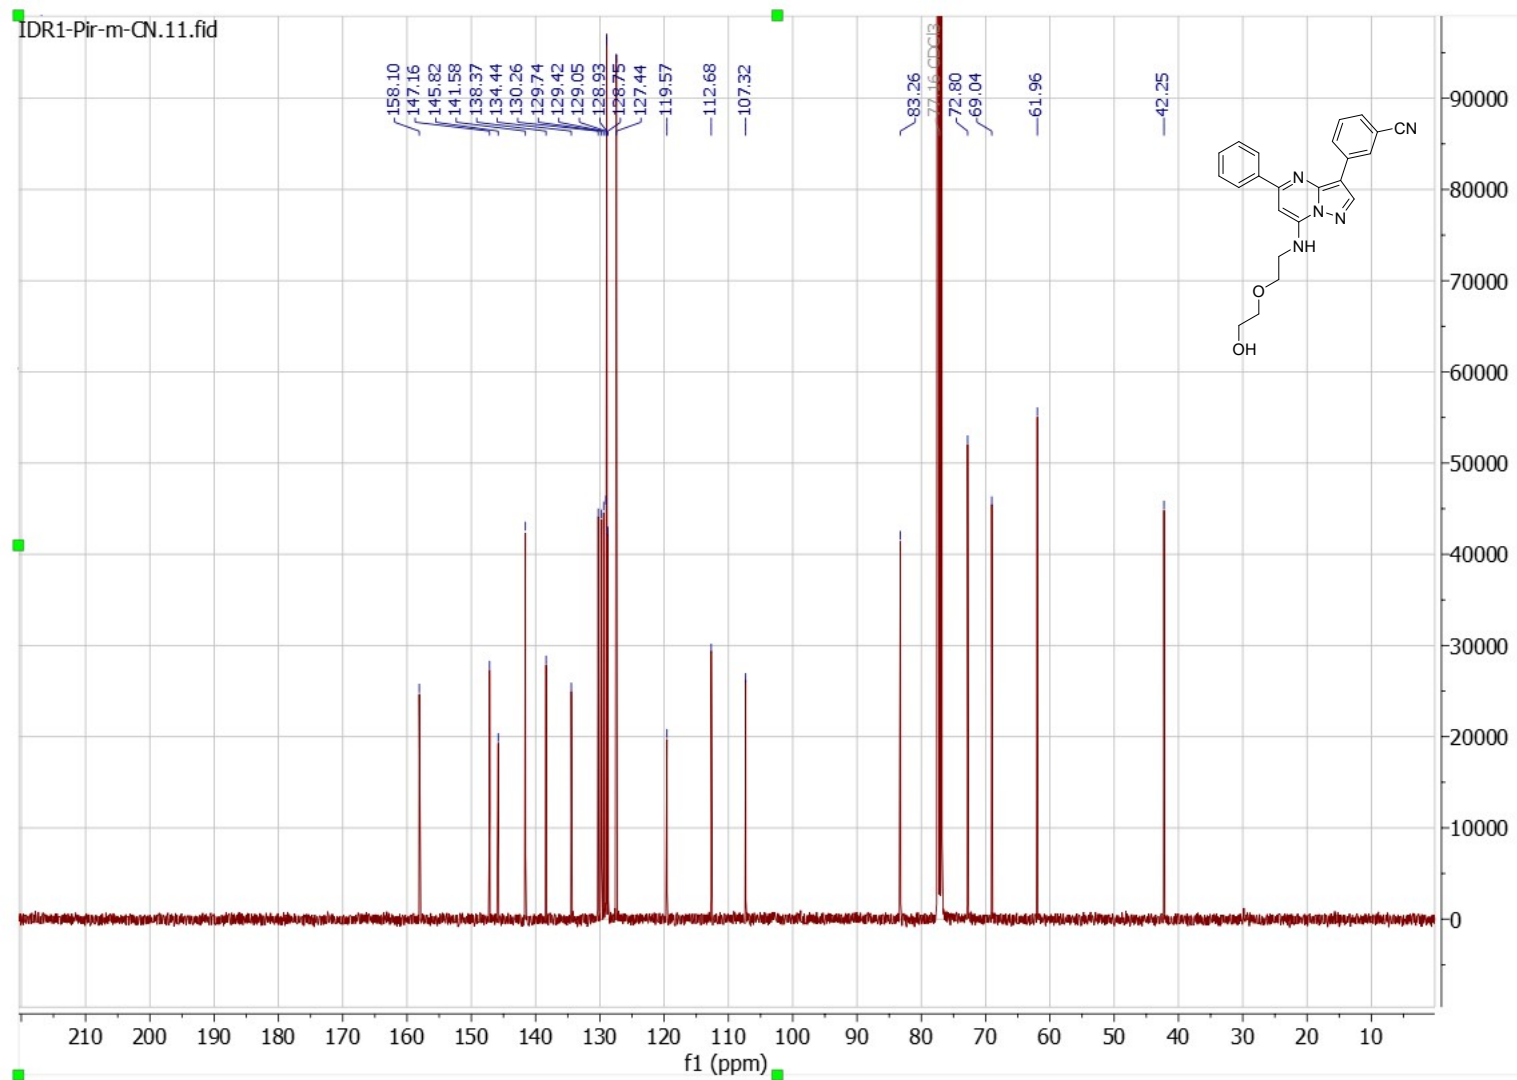

<sup>1</sup>H-NMR spectrum of **11** in CDCl<sub>3</sub>

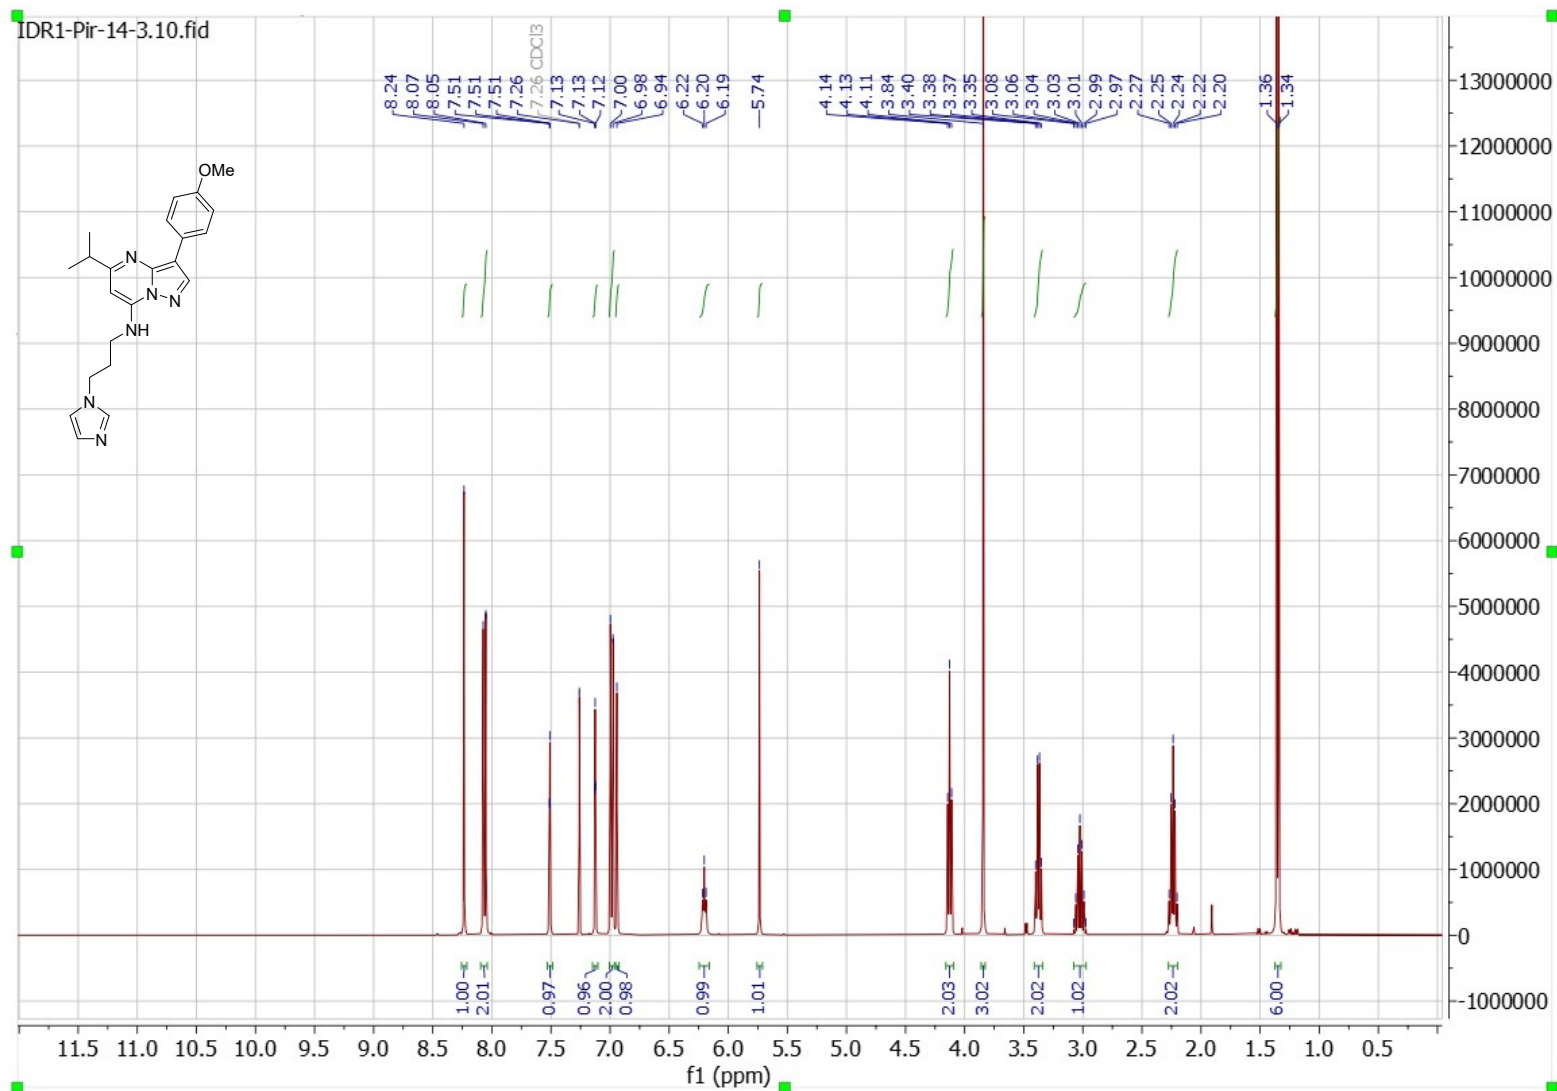

<sup>13</sup>C-NMR spectrum of **11** in CDCl<sub>3</sub>

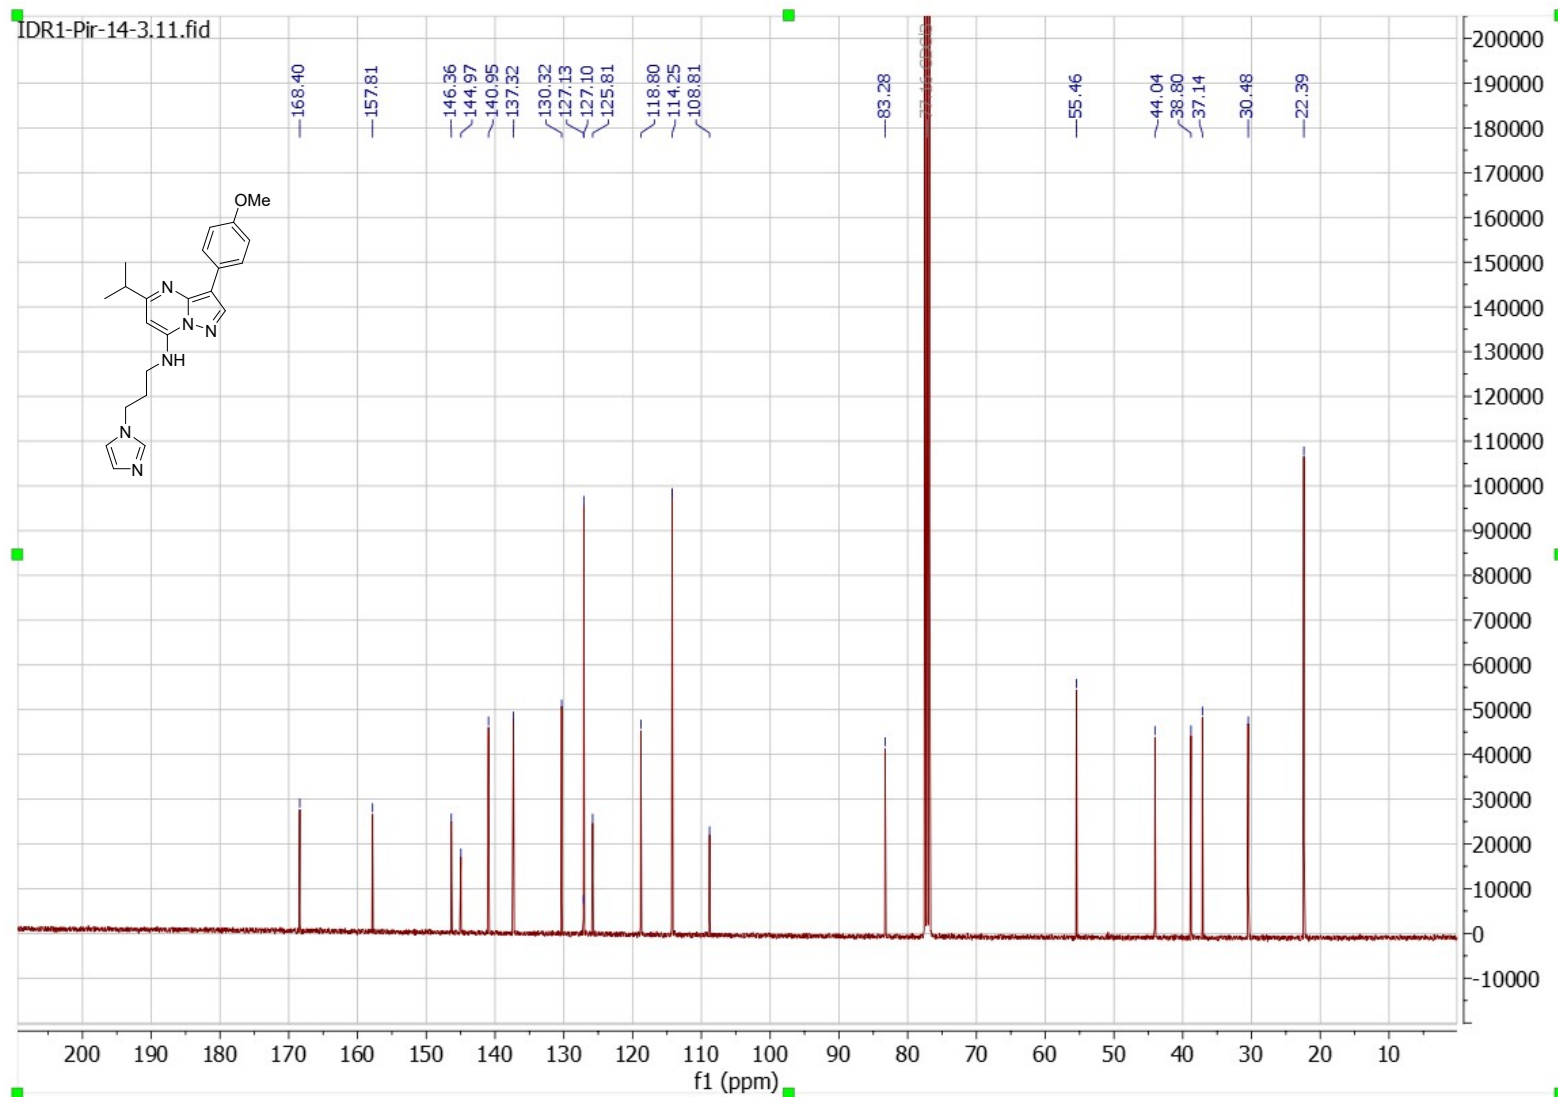

<sup>1</sup>H-NMR spectrum of **12** in CDCl<sub>3</sub>

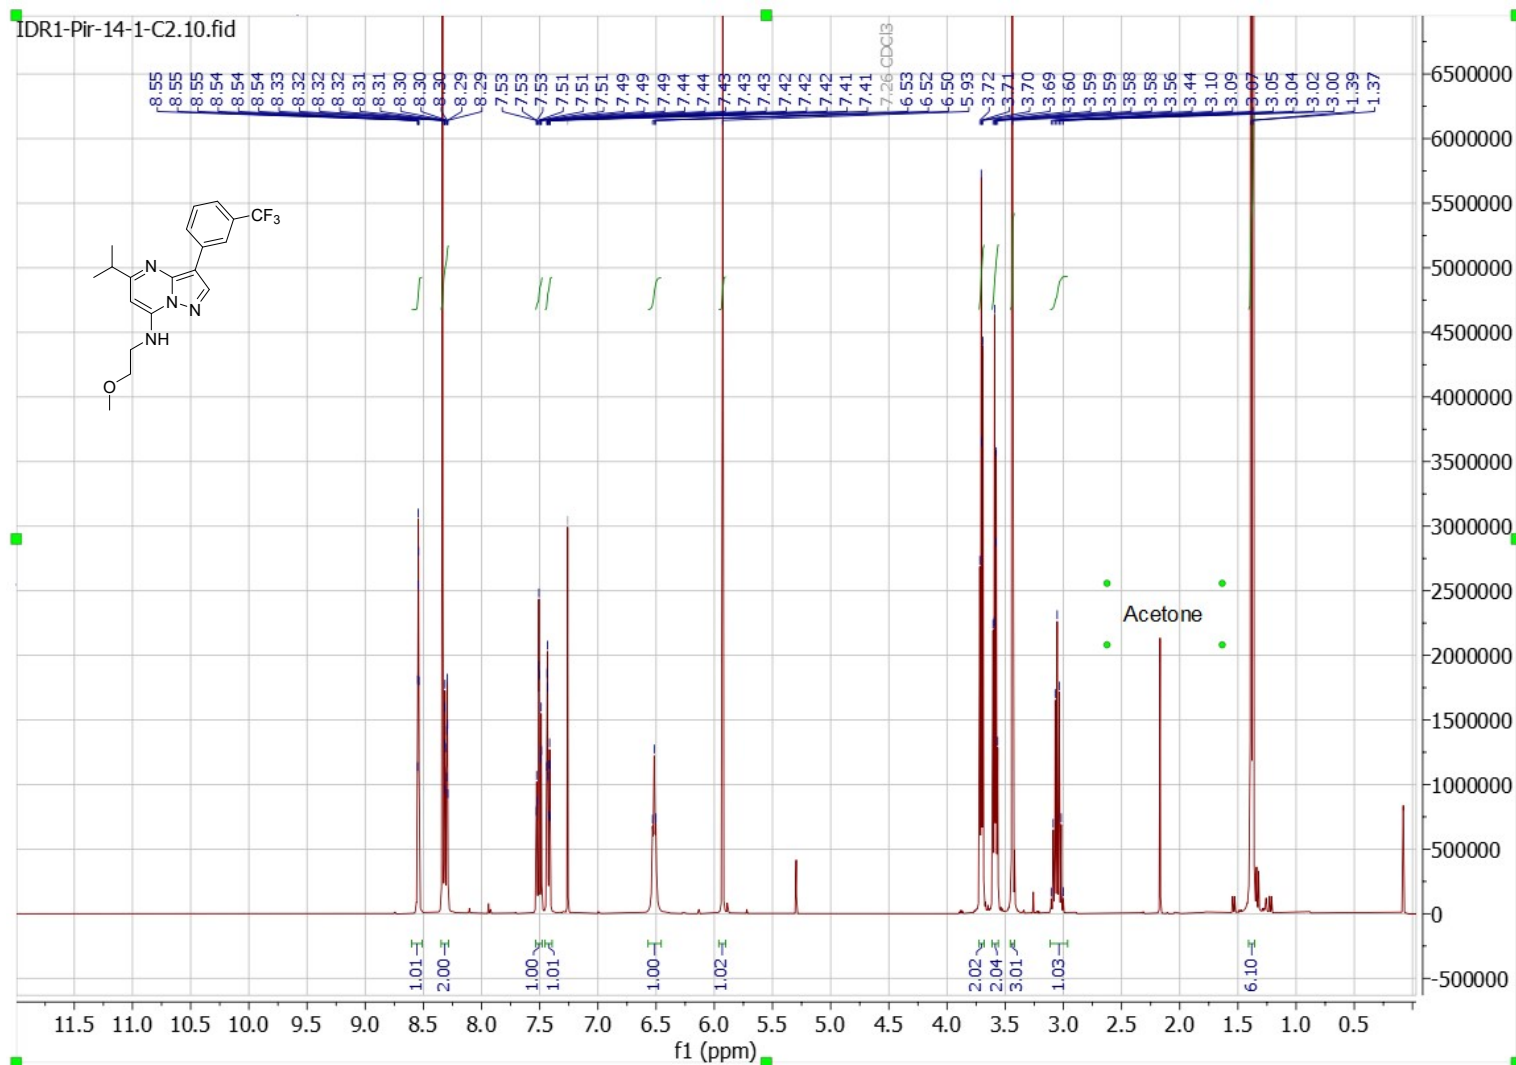

$^{13}\text{C}$ -NMR spectrum of **12** in  $\text{CDCl}_3$

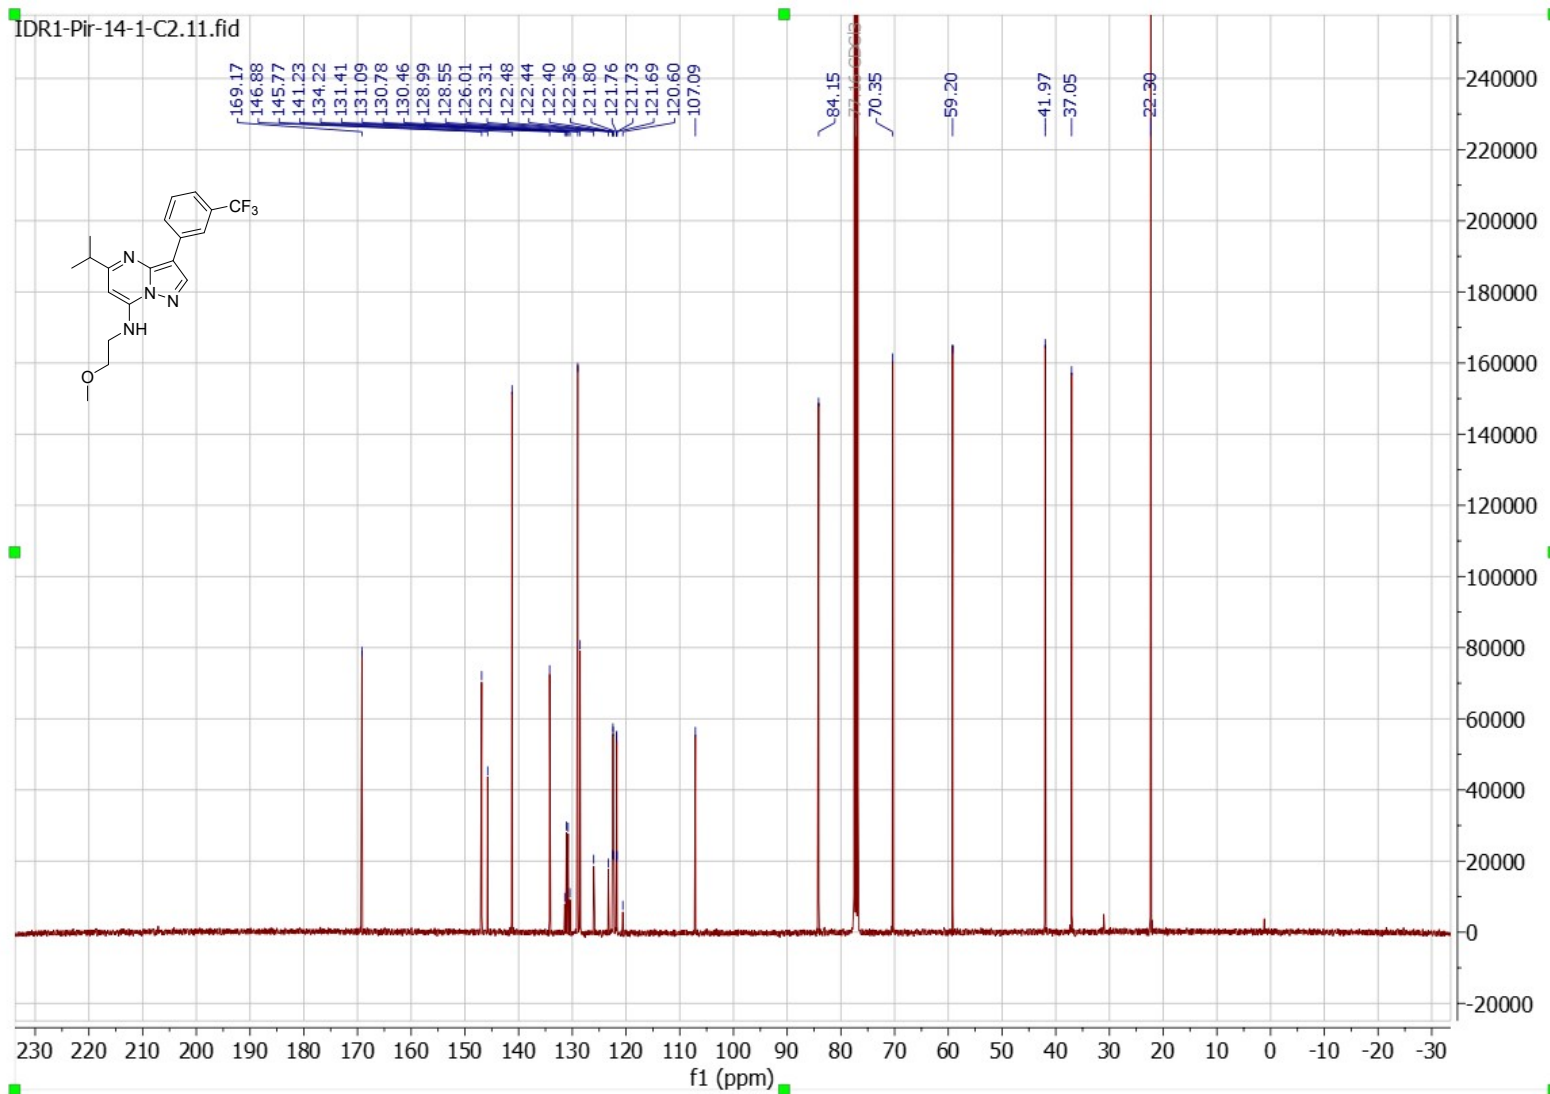

<sup>1</sup>H-NMR spectrum of **13** in CDCl<sub>3</sub>

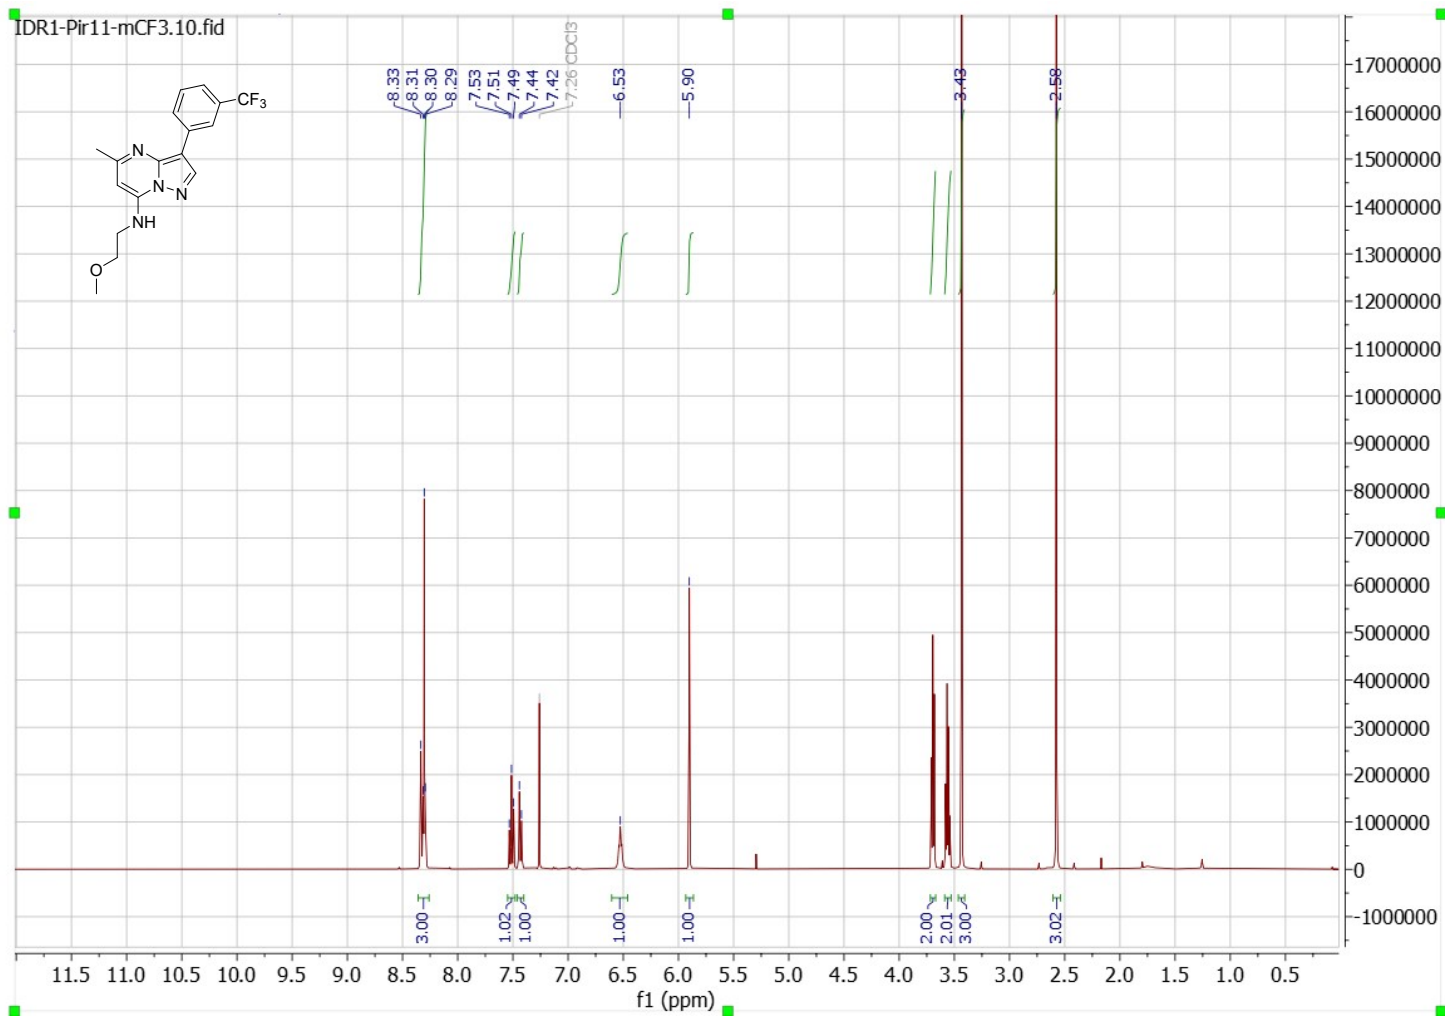

<sup>13</sup>C-NMR spectrum of **13** in CDCl<sub>3</sub>

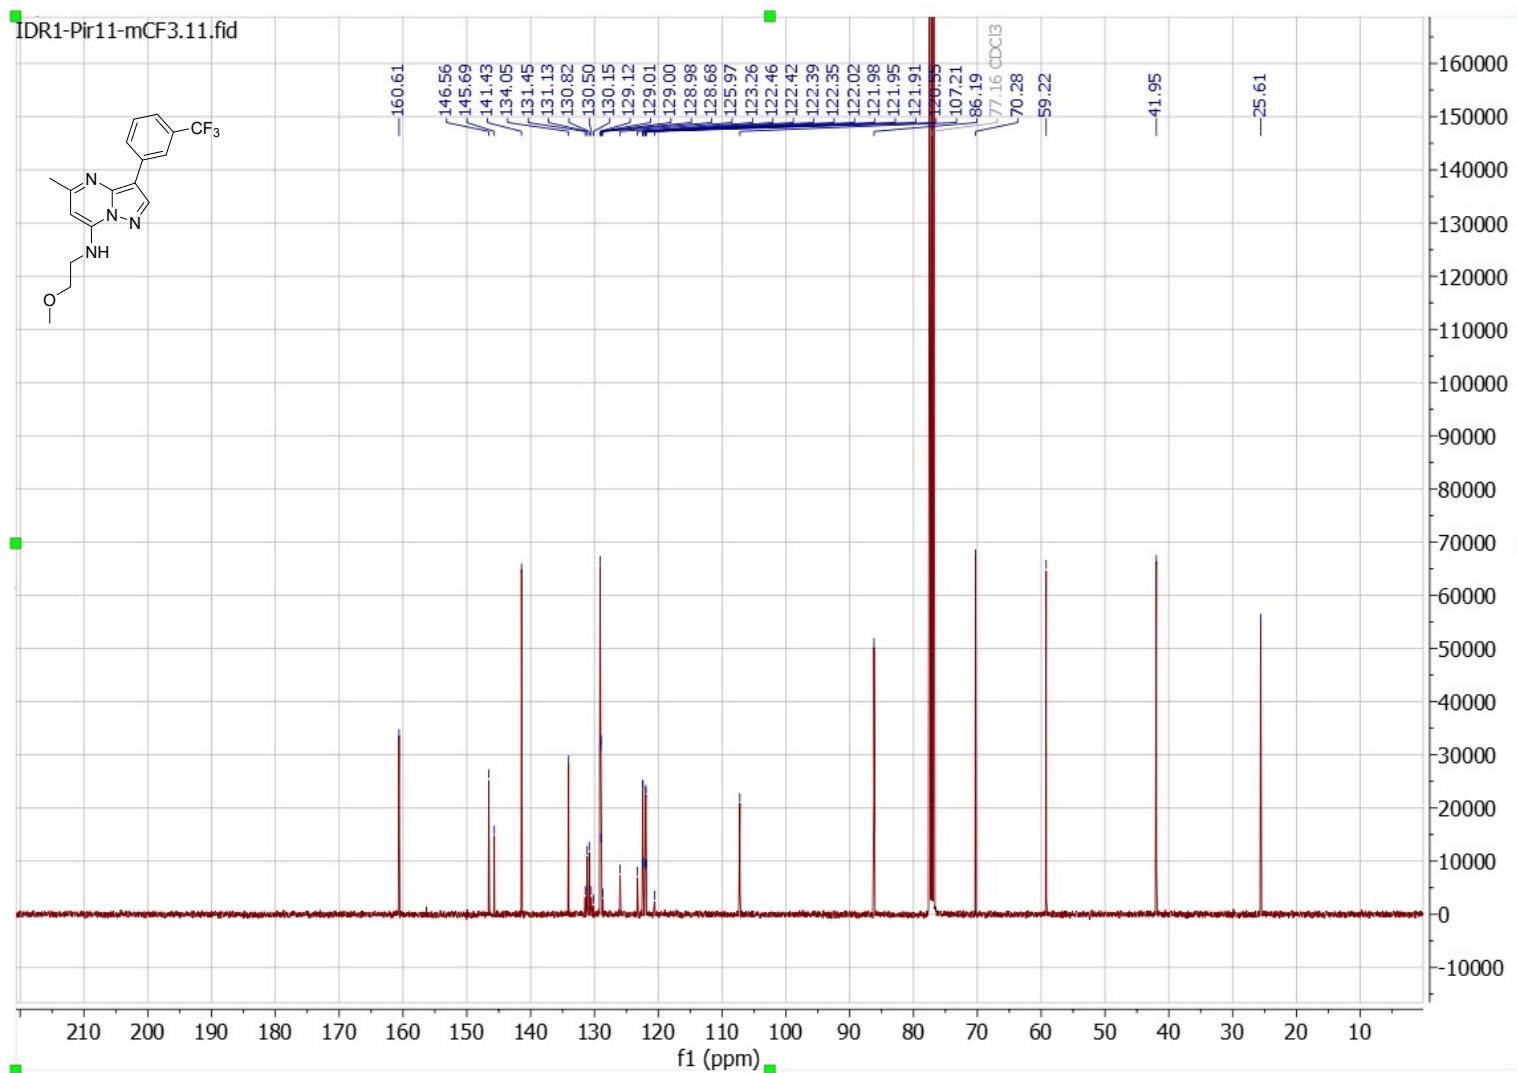

$^1\text{H-NMR}$  spectrum of **14** in  $\text{CDCl}_3$

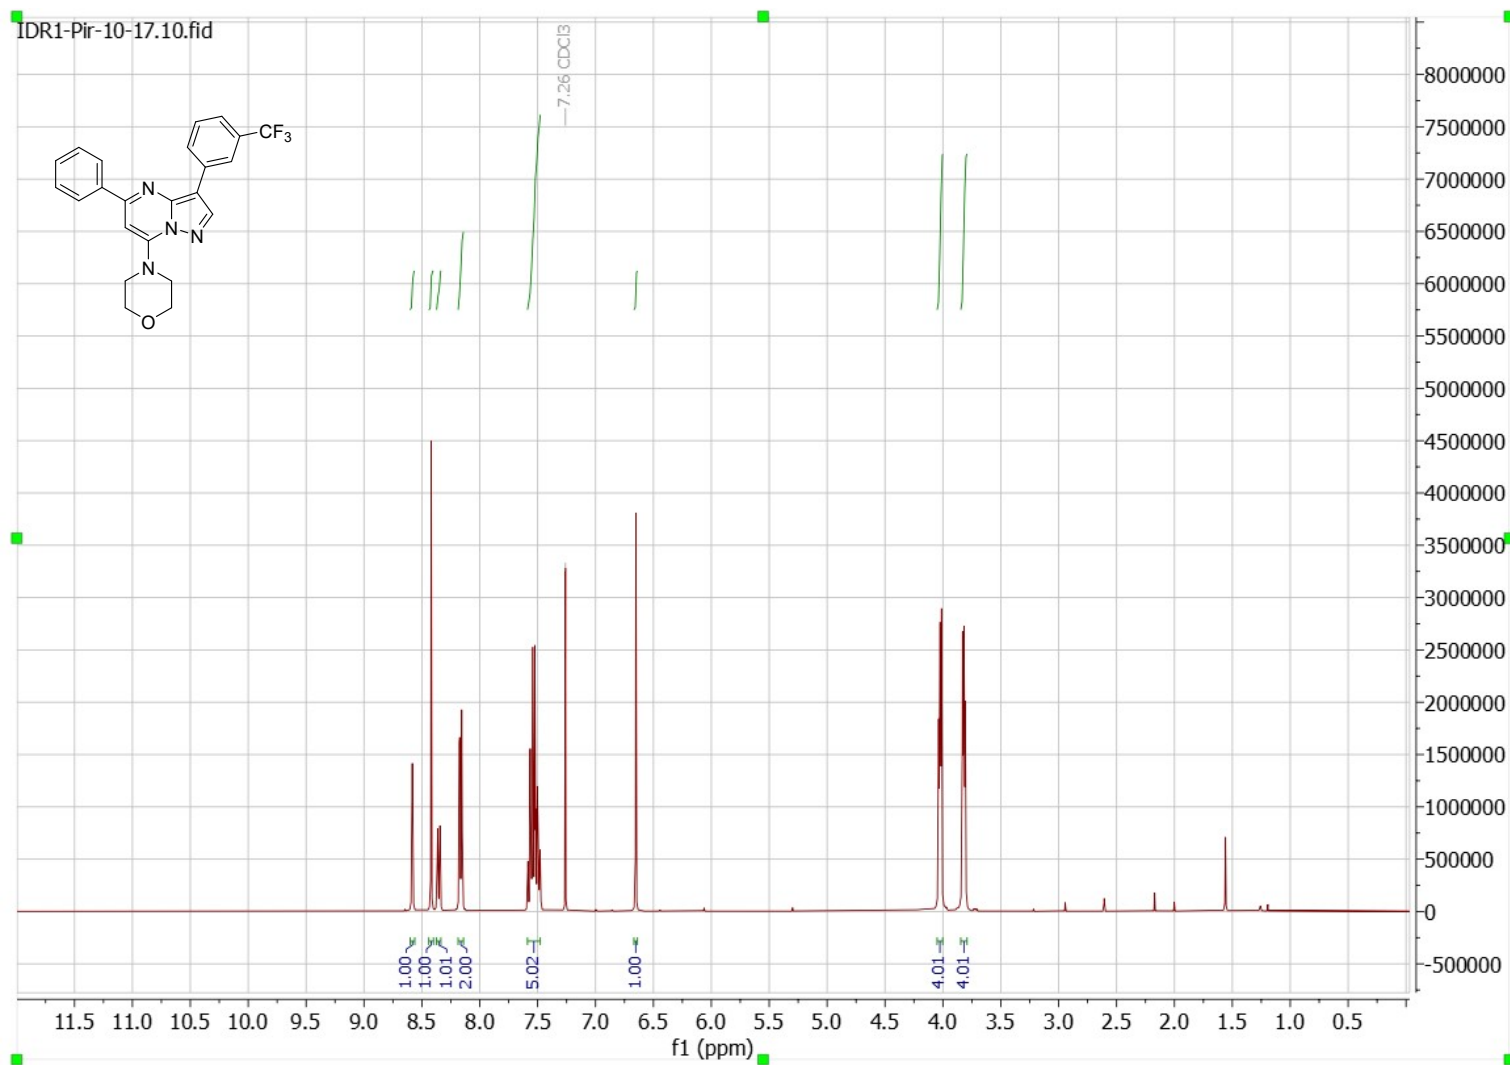



<sup>13</sup>C-NMR spectrum of **14** in CDCl<sub>3</sub>

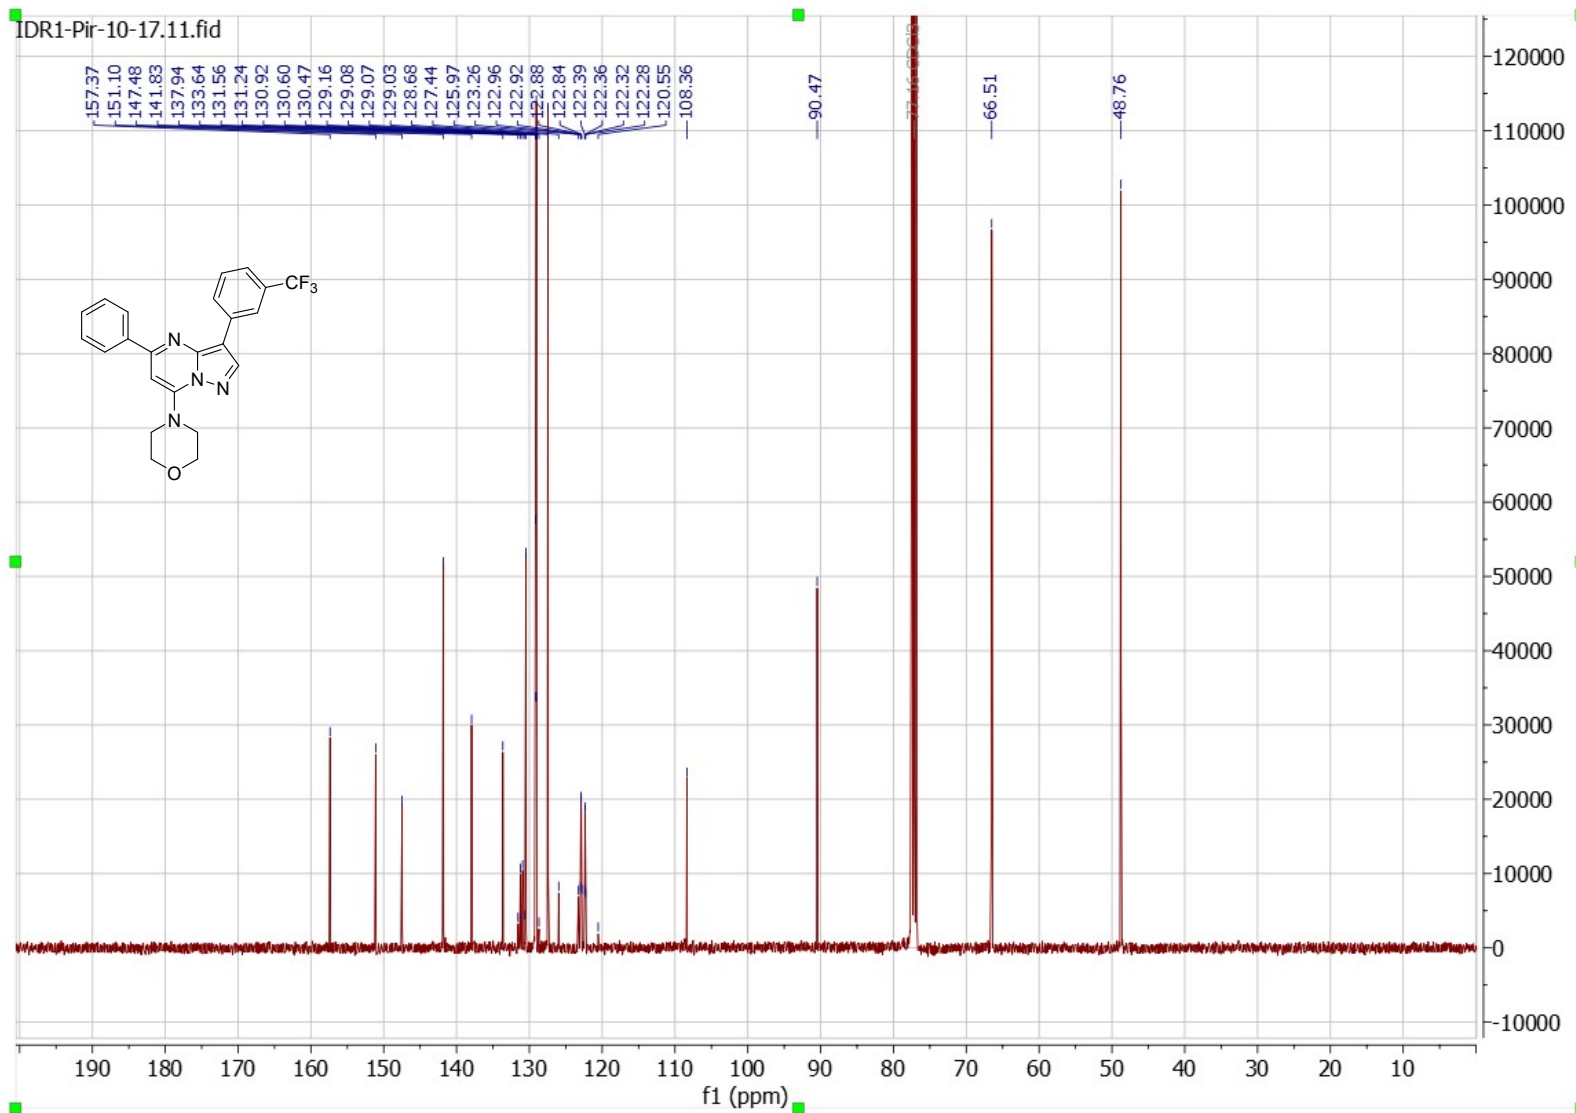

<sup>1</sup>H-NMR spectrum of **7i** in CD<sub>3</sub>OD

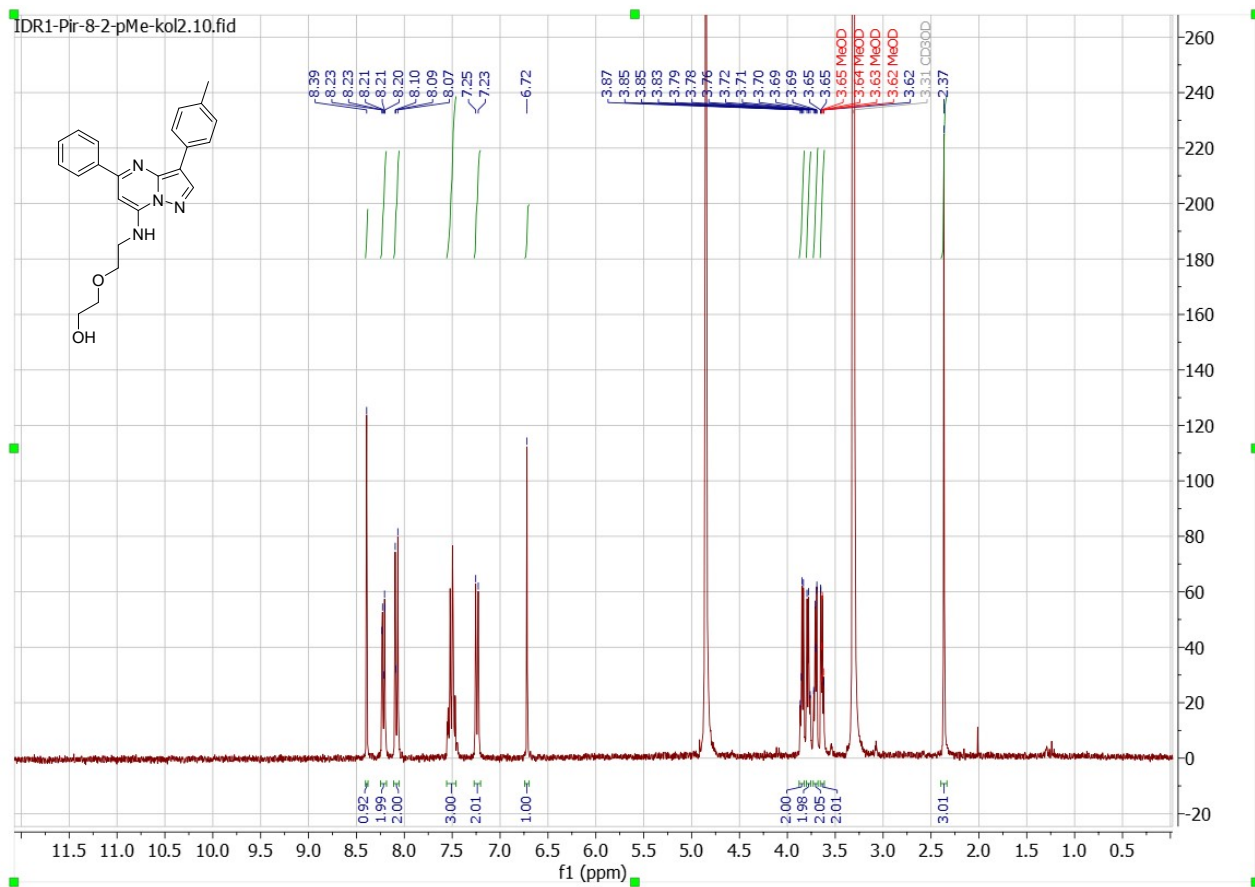

$^{13}\text{C}$ -NMR spectrum of **7i** in  $\text{CD}_3\text{OD}$

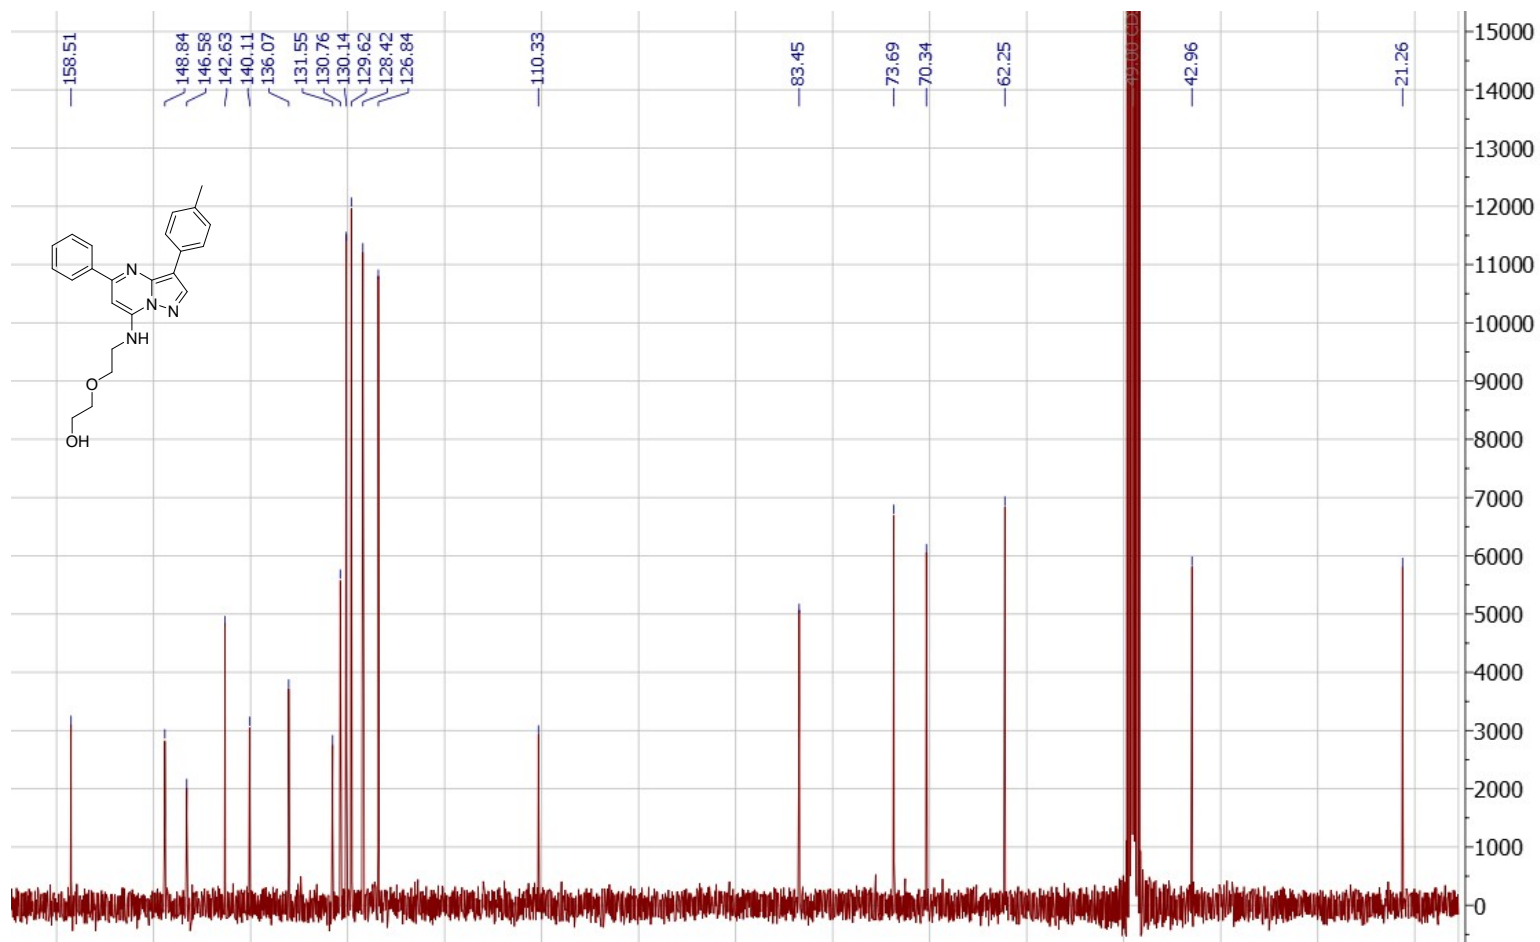

<sup>1</sup>H-NMR spectrum of **7m** in CD<sub>3</sub>OD

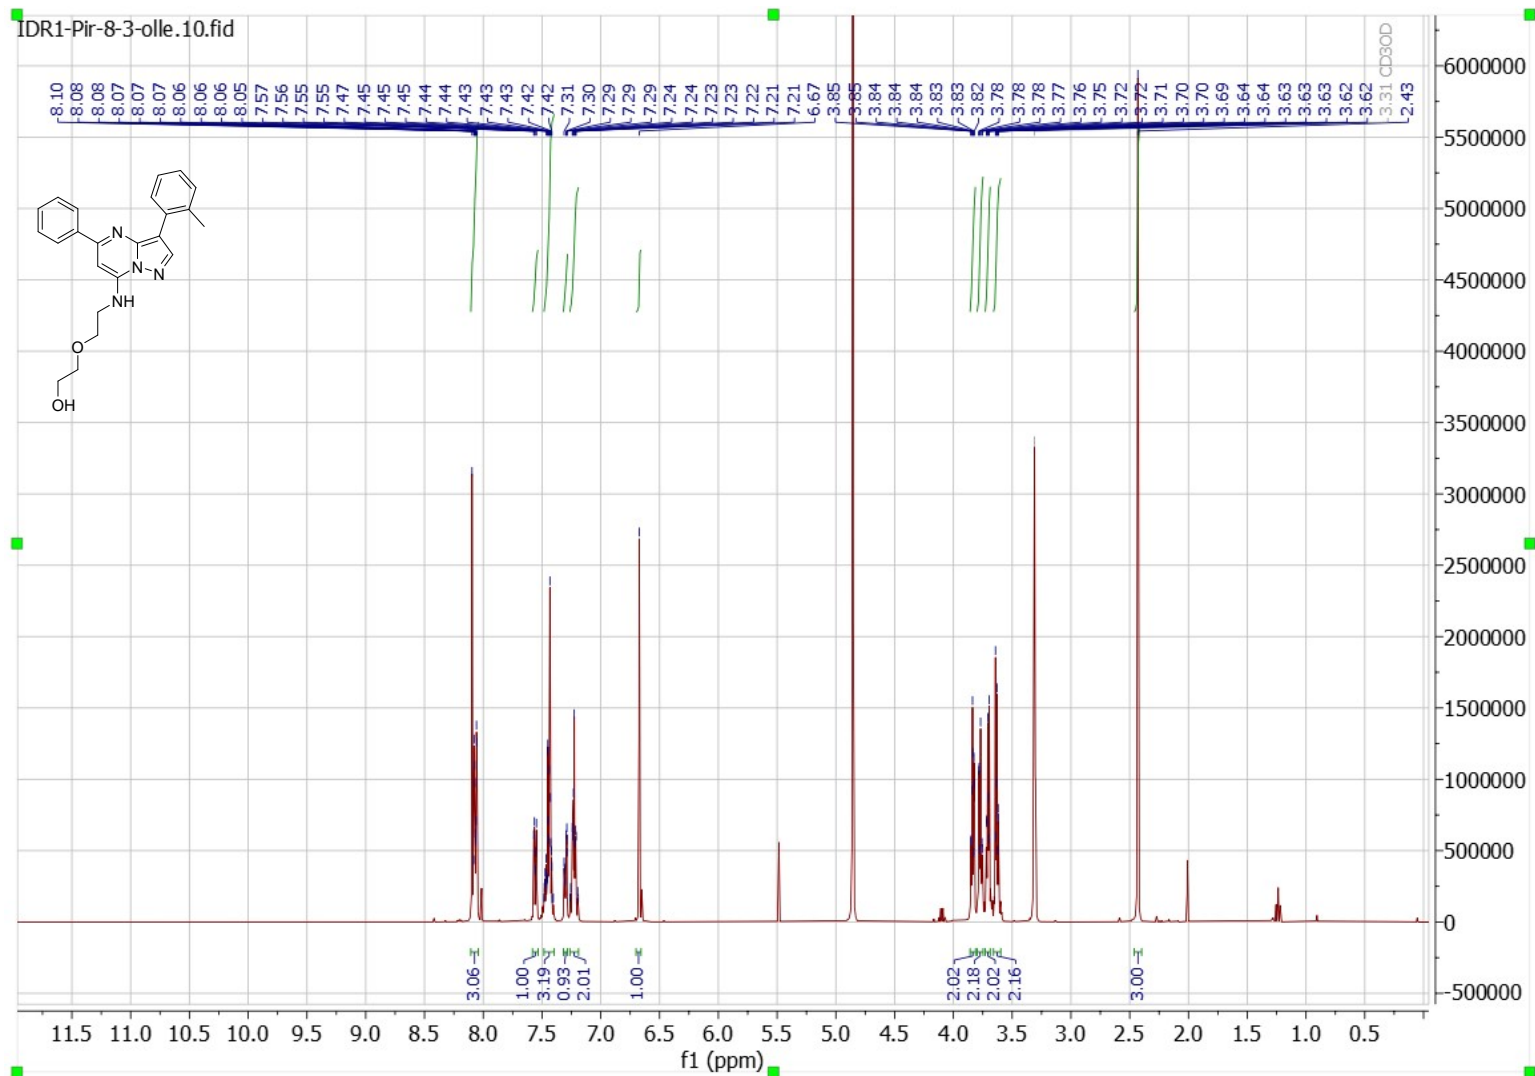

<sup>13</sup>C-NMR spectrum of **7m** in CD<sub>3</sub>OD

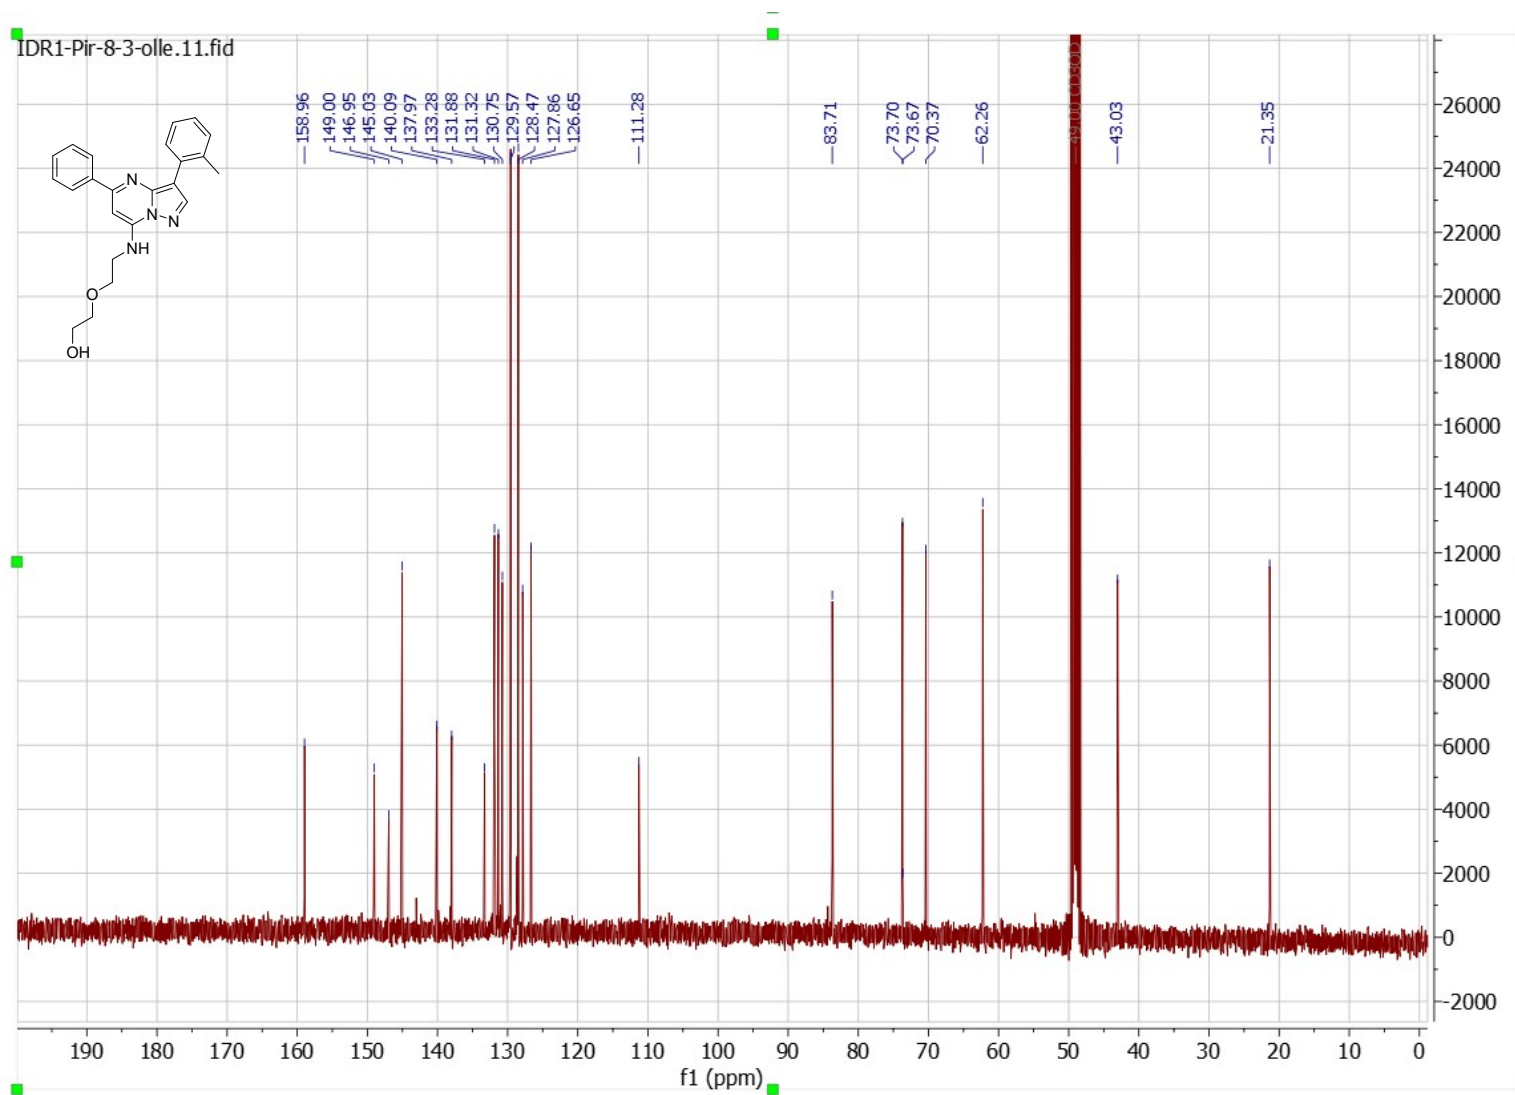

Supplement: d4md00266k2.pdf [file d4md00266k2.pdf]
